# Supplementary material
Source: MDPI journal article supplement (https://www.mdpi.com/1996-1073/16/20/7140)
Supplement: s1 [file s1]

## S1-Supplementary Materials:

### Recommended international regulations on solid biofuels

The committee responsible for biomass standardization in Spain is the CTN 164 "Solid Biofuels," established within UNE, with CIEMAT fulfilling the secretariat role. Within the committee, there are only three purely national standards without European or international counterparts. 76% of the standards are international and also European (EN-ISO), while the remaining 17% are European standards without ISO counterparts (EN). Essentially, the standards related to solid biomass fall into three types:

- Standards for sampling and characterization
- Standards for specifications and classes
- Standards for quality.

**Table S1.** Recommended international regulations.

| Standard                               | Title                                                                                                                                                                                            |
|----------------------------------------|--------------------------------------------------------------------------------------------------------------------------------------------------------------------------------------------------|
| <b>General rules on solid biofuels</b> |                                                                                                                                                                                                  |
| UNE-EN ISO 16993:2017                  | Solid biofuels. Conversion of analytical results from one base to another (ISO 16993:2016)                                                                                                       |
| UNE-EN ISO 16559:2022.                 | Solid biofuels. Vocabulary. (ISO 16559:2022).                                                                                                                                                    |
| UNE-EN ISO 19743:2018                  | Solid biofuels. Determination of the content of heavy foreign materials of more than 3.15 mm. (ISO 19743:2017).                                                                                  |
| <b>Sampling</b>                        |                                                                                                                                                                                                  |
| UNE-EN ISO 14780:2018                  | Solid biofuels. Preparation of sample. (ISO 14780:2017).                                                                                                                                         |
| UNE-EN ISO 18135:2018                  | Solid biofuels. Sampling. (ISO 18135:2017).                                                                                                                                                      |
| UNE-EN ISO 14780:2018/A1:2020          | Solid biofuels. Preparation of sample. Modification 1. (ISO 14780:2017/Amd 1:2019).                                                                                                              |
| UNE-EN ISO 21945:2021                  | Solid biofuels. Simplified sampling method for small-scale applications. (ISO 21945:2020).                                                                                                       |
| <b>Humidity</b>                        |                                                                                                                                                                                                  |
| UNE-EN ISO 18134-1:2023                | Solid biofuels. Determination of moisture content. Part 1: Reference method. (ISO 18134-1:2022).                                                                                                 |
| UNE-EN ISO 18134-2:2017                | Solid biofuels. Determination of moisture content. Oven drying method. Part 2: Total humidity. simplified method. (ISO 18134-2:2017).                                                            |
| UNE-EN ISO 18134-3:2016                | Solid biofuels. Determination of moisture content. Oven drying method. Part 3. Sample moisture for general analysis. (ISO 18134-3:2015).                                                         |
| <b>Ashes</b>                           |                                                                                                                                                                                                  |
| UNE-EN ISO 18122:2023.                 | Solid biofuels. Determination of ash content. (ISO 18122:2022).                                                                                                                                  |
| UNE-EN ISO 21404:2021                  | Solid biofuels. Determination of the behavior of the fusion of the ashes. (ISO 21404:2020).                                                                                                      |
| <b>Volatile matter</b>                 |                                                                                                                                                                                                  |
| UNE-EN ISO 18123:2016                  | Solid biofuels. Determination of the volatile matter content. (ISO 18123:2015).                                                                                                                  |
| <b>Calorific value</b>                 |                                                                                                                                                                                                  |
| UNE-EN ISO 18125:2018                  | Solid biofuels. Calorific value determination. (ISO 18125:2017).                                                                                                                                 |
| <b>Elemental composition analysis</b>  |                                                                                                                                                                                                  |
| UNE-EN ISO 16948:2015                  | Solid biofuels. Determination of total carbon, hydrogen and nitrogen content. (ISO 16948:2015).                                                                                                  |
| UNE-EN ISO 16967:2015                  | Solid biofuels. Determination of majority elements. Al, Ca, Fe, Mg, P, K, Si, Na and Ti. (ISO 16967:2015).                                                                                       |
| UNE-EN ISO 16968:2015                  | Solid biofuels. Determination of minority elements. (ISO 16968:2015).                                                                                                                            |
| UNE-EN ISO 16994:2017                  | Solid biofuels. Determination of total sulfur and chlorine content. (ISO 16994:2016).                                                                                                            |
| <b>Bulk density and particle size</b>  |                                                                                                                                                                                                  |
| UNE-EN ISO 17828:2016                  | Solid biofuels. Determination of bulk density. (ISO 17828:2015).                                                                                                                                 |
| UNE-EN ISO 17827-1:2016                | Solid biofuels. Determination of the particle size distribution for uncompressed fuels. Part 1: Oscillating sieve method with mesh opening equal to or greater than 3.15 mm. (ISO 17827-1:2016). |

|                              |                                                                                                                                                                                             |
|------------------------------|---------------------------------------------------------------------------------------------------------------------------------------------------------------------------------------------|
| UNE-EN ISO 17827-2:2016      | Solid biofuels. Determination of the particle size distribution for uncompressed fuels. Part 2: Vibrating sieve method with mesh opening less than or equal to 3.15 mm. (ISO 17827-2:2016). |
| UNE-CEN/TR 15149-3:2015 IN   | Solid biofuels. Determination of the particle size distribution. Part 3: Rotary sieve method.                                                                                               |
| <b>Solid biofuel classes</b> |                                                                                                                                                                                             |
| UNE-EN ISO 17225-1:2022.     | Solid biofuels. Specifications and classes of fuels. Part 1: General requirements. (ISO 17225-1:2021).                                                                                      |
| UNE-EN ISO 17225-2:2021.     | Solid biofuels. Specifications and classes of fuels. Part 2: Kinds of wood pellets. (ISO17225-2:2021).                                                                                      |
| UNE-EN ISO 17225-3:2021.     | Solid biofuels. Specifications and classes of fuels. Part 3: Kinds of wood briquettes. (ISO 17225-3:2021).                                                                                  |
| UNE-EN ISO 17225-4:2021.     | Solid biofuels. Specifications and classes of fuels. Part 4: Kinds of wood chips. (ISO 17225-4:2021).                                                                                       |
| UNE-EN ISO 17225-5:2022.     | Solid biofuels. Specifications and classes of fuels. Part 5: Kinds of wood fire. (ISO 17225-5:2021).                                                                                        |
| UNE-EN ISO 17225-6:2022.     | Solid biofuels. Specifications and classes of fuels. Part 6: Classes of pellets of non-woody origin. (ISO 17225-6:2021).                                                                    |
| UNE-EN ISO 17225-7:2022.     | Solid biofuels. Specifications and classes of fuels. Part 7: Classes of briquettes of non-woody origin. (ISO 17225-7:2021).                                                                 |
| UNE-EN ISO 17225-8:2023.     | Solid biofuels. Specifications and classes of fuels. Part 8: Classes of densified and thermally treated biomass fuels for commercial and industrial use. (ISO 17225-8:2023).                |
| UNE-EN ISO 17225-9:2022.     | Solid biofuels. Specifications and classes of fuels. Part 9: Classes of shredded fuel and wood chips for industrial use. (ISO 17225-9:2021).                                                |
| UNE 164004:2022.             | Solid biofuels. Specifications and classes of biofuels. Fruit shells.                                                                                                                       |
| UNE 164003:2022.             | Solid biofuels. Specifications and classes of biofuels. Olive pits.                                                                                                                         |
| <b>Quality assurance</b>     |                                                                                                                                                                                             |
| UNE-EN 15234-1:2011          | Solid biofuels. Fuel quality assurance. Part 1: General requirements.                                                                                                                       |
| UNE-EN 15234-2:2012          | Solid biofuels. Fuel quality assurance. Part 2: Wood pellets for non-industrial use.                                                                                                        |
| UNE-EN 15234-3:2012          | Solid biofuels. Fuel quality assurance. Part 3: Wood briquettes for non-industrial use.                                                                                                     |
| UNE-EN 15234-4:2012          | Solid biofuels. Fuel quality assurance. Part 4: Wood chips for non-industrial use.                                                                                                          |
| UNE-EN 15234-5:2012          | Solid biofuels. Fuel quality assurance. Part 5: Firewood for non-industrial use.                                                                                                            |
| UNE-EN 15234-6:2012          | Solid biofuels. Fuel quality assurance. Part 6: Non-woody pellets for non-industrial use.                                                                                                   |
